# Supplementary material
Source: PubMed Central journal article supplement (PMC5373947)
Supplement: NIHMS848917-supplement-Supp_Info.pdf [file NIHMS848917-supplement-Supp_Info.pdf]

Quantile-quantile plot of p values

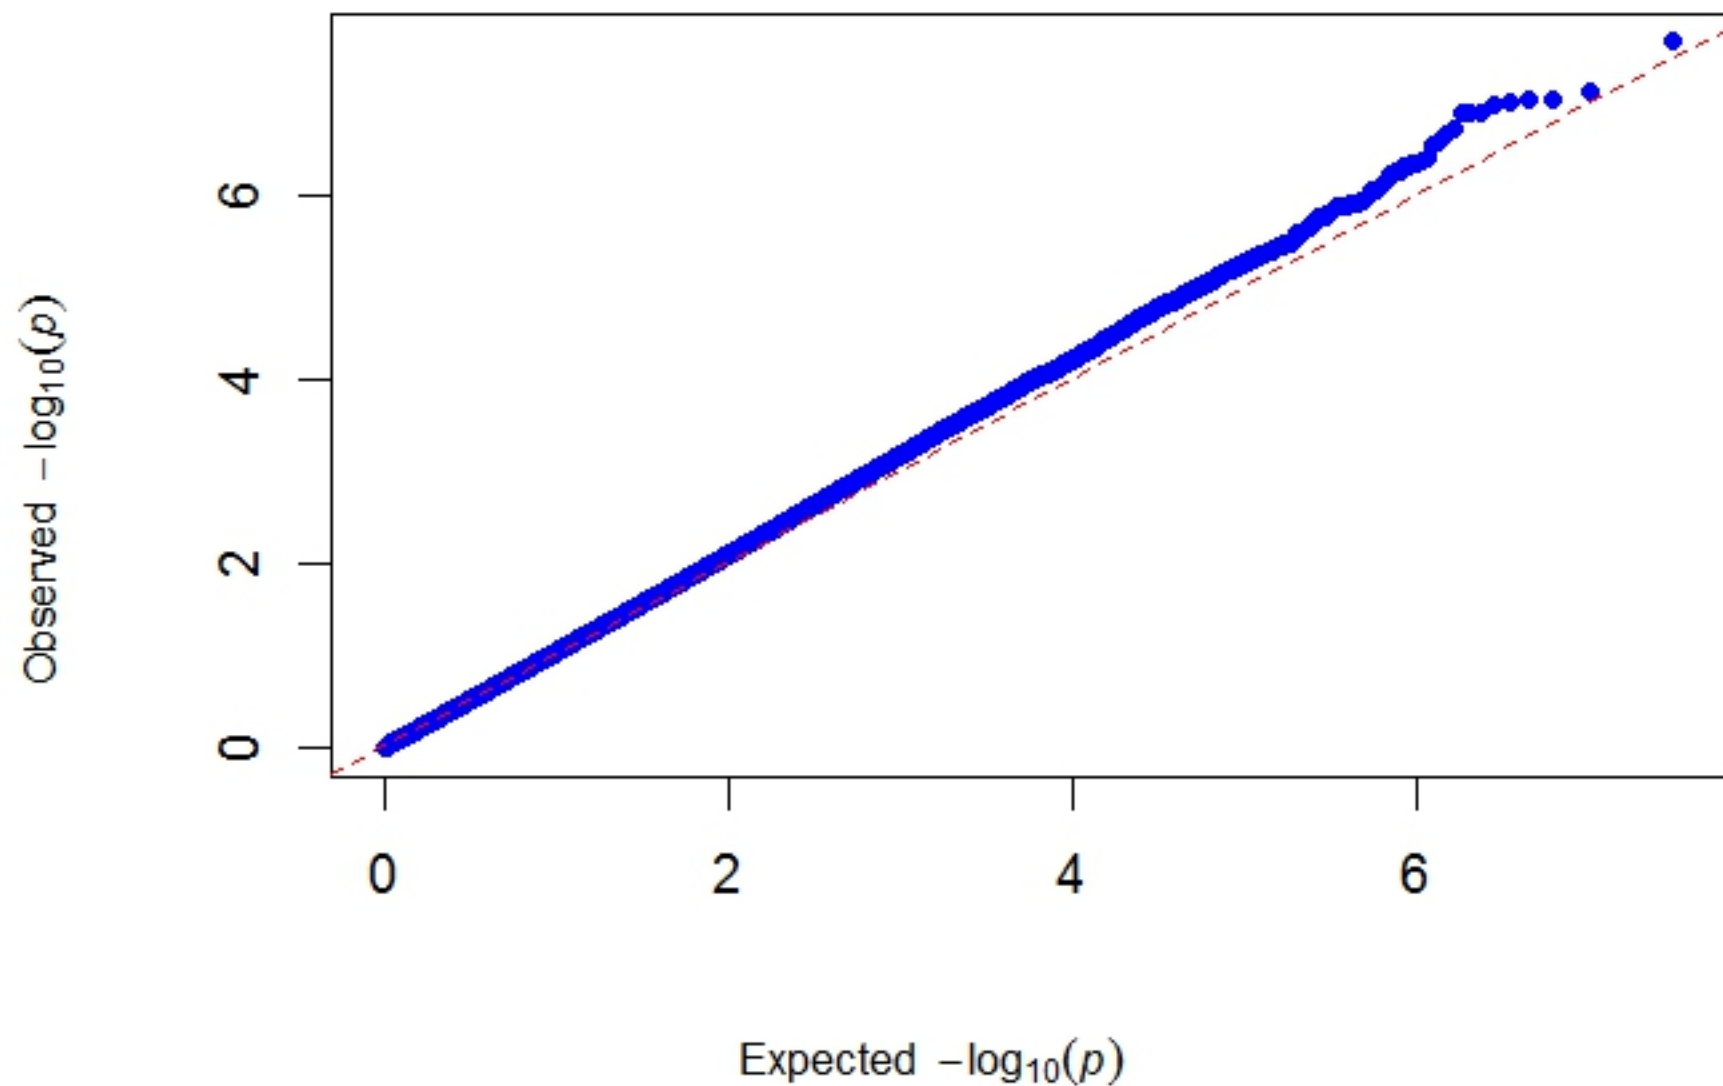

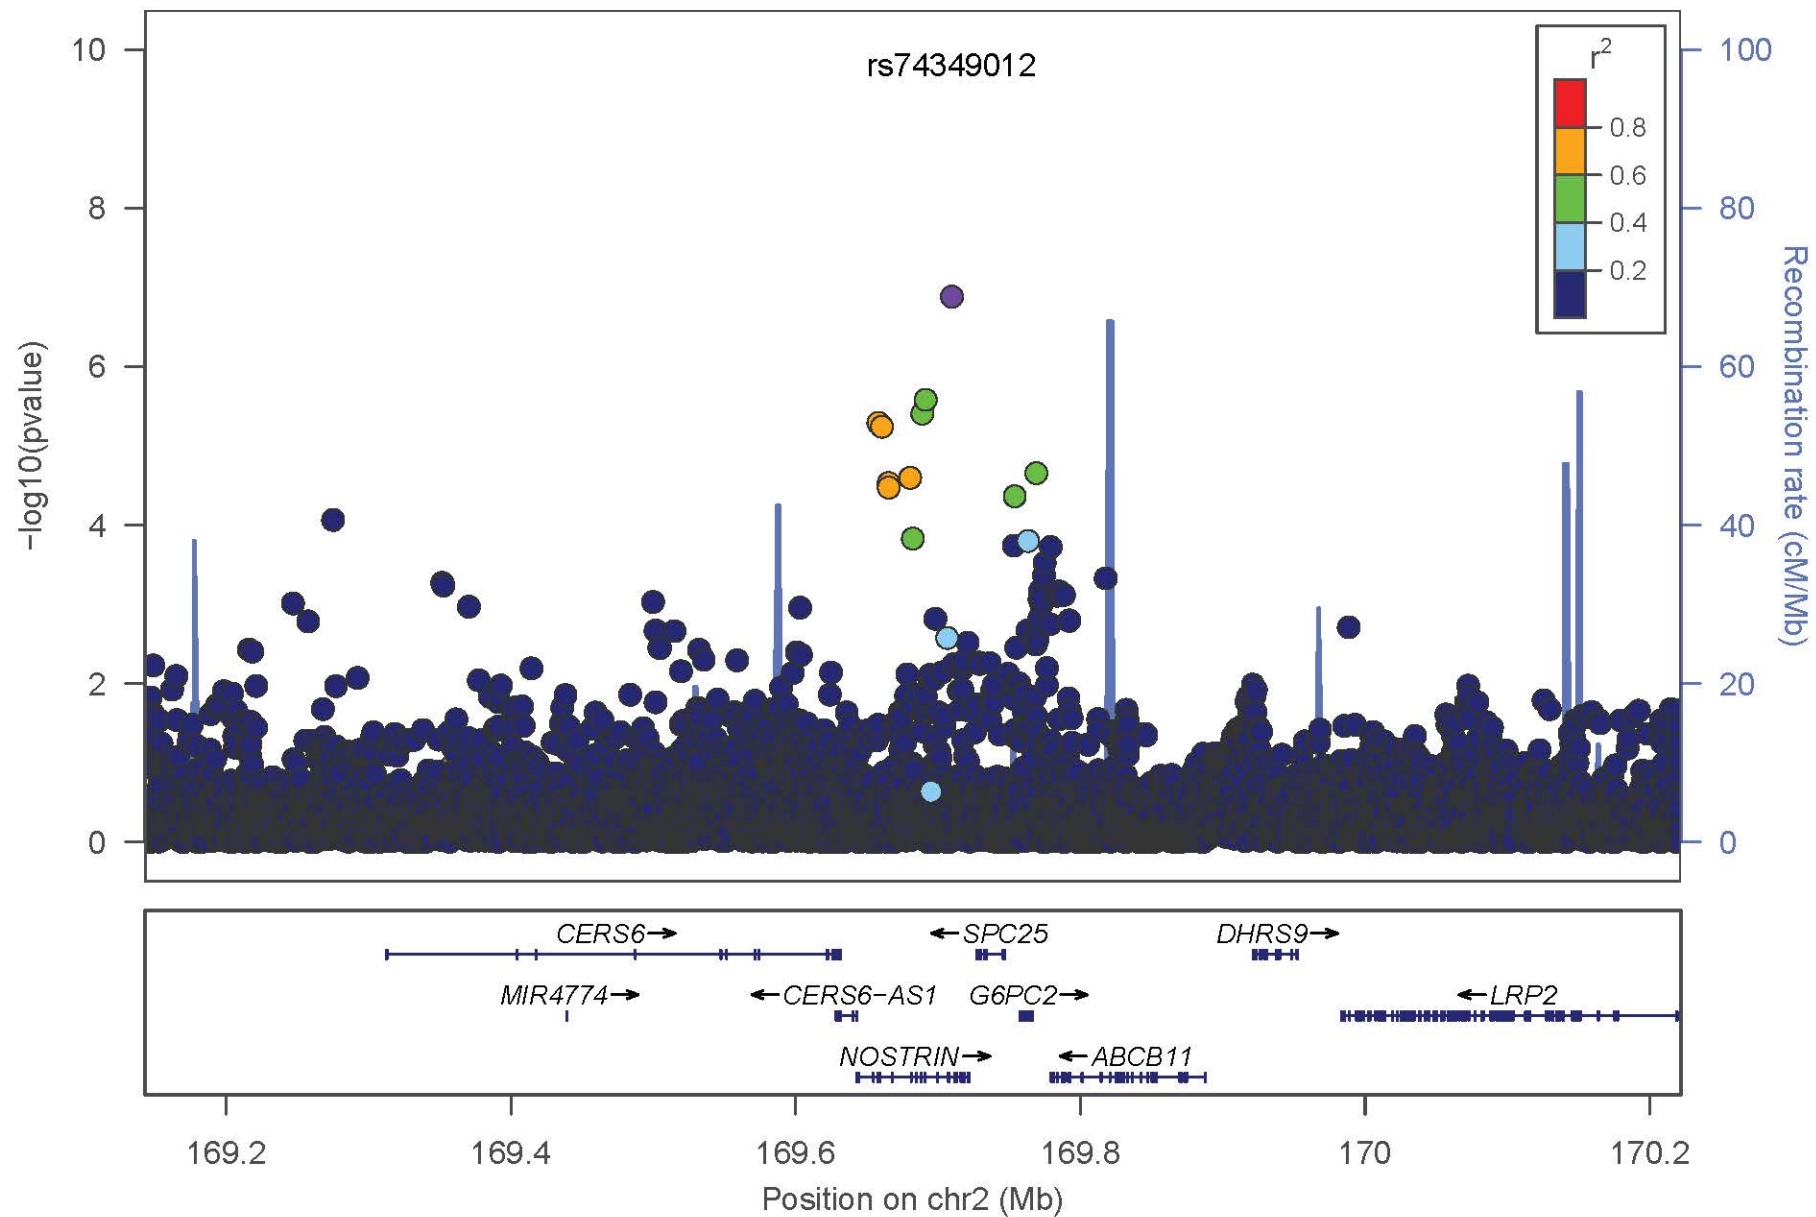

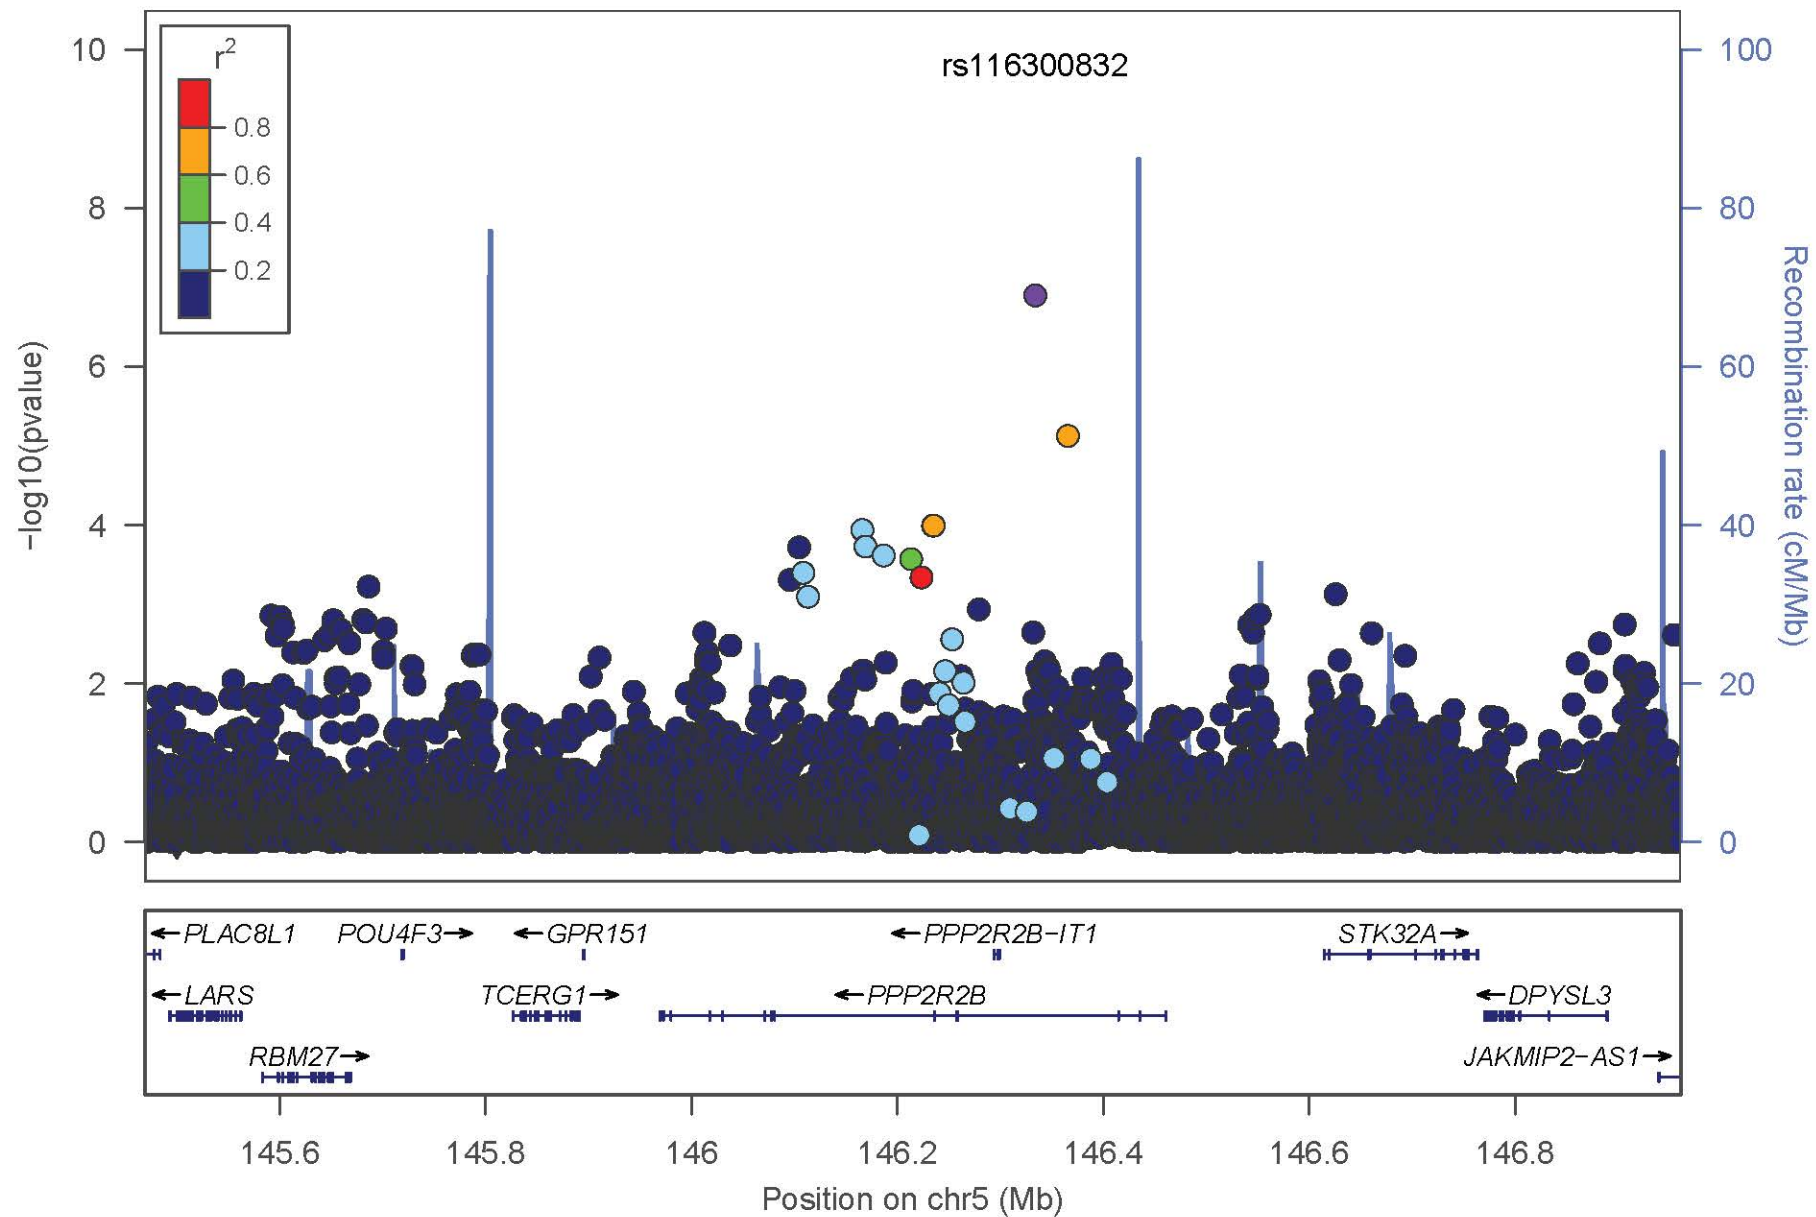

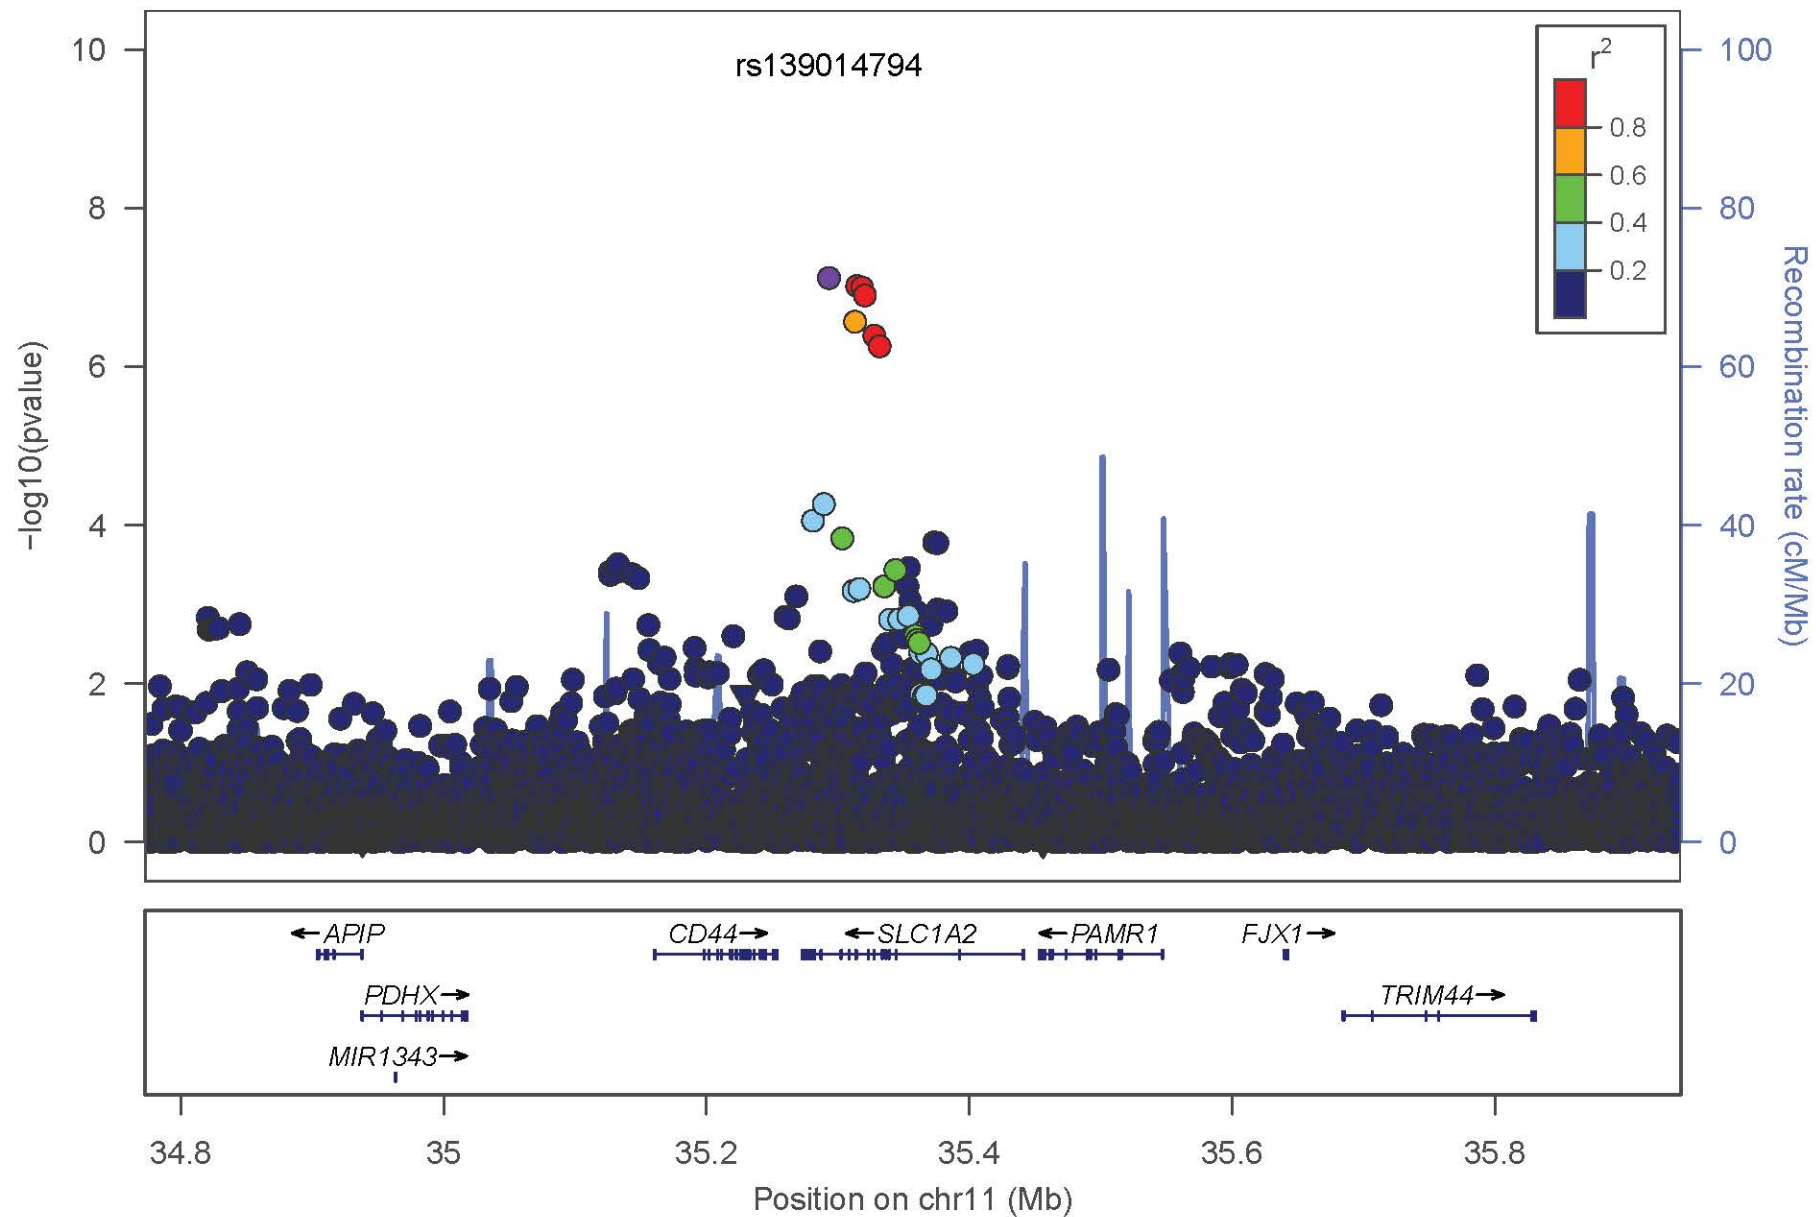

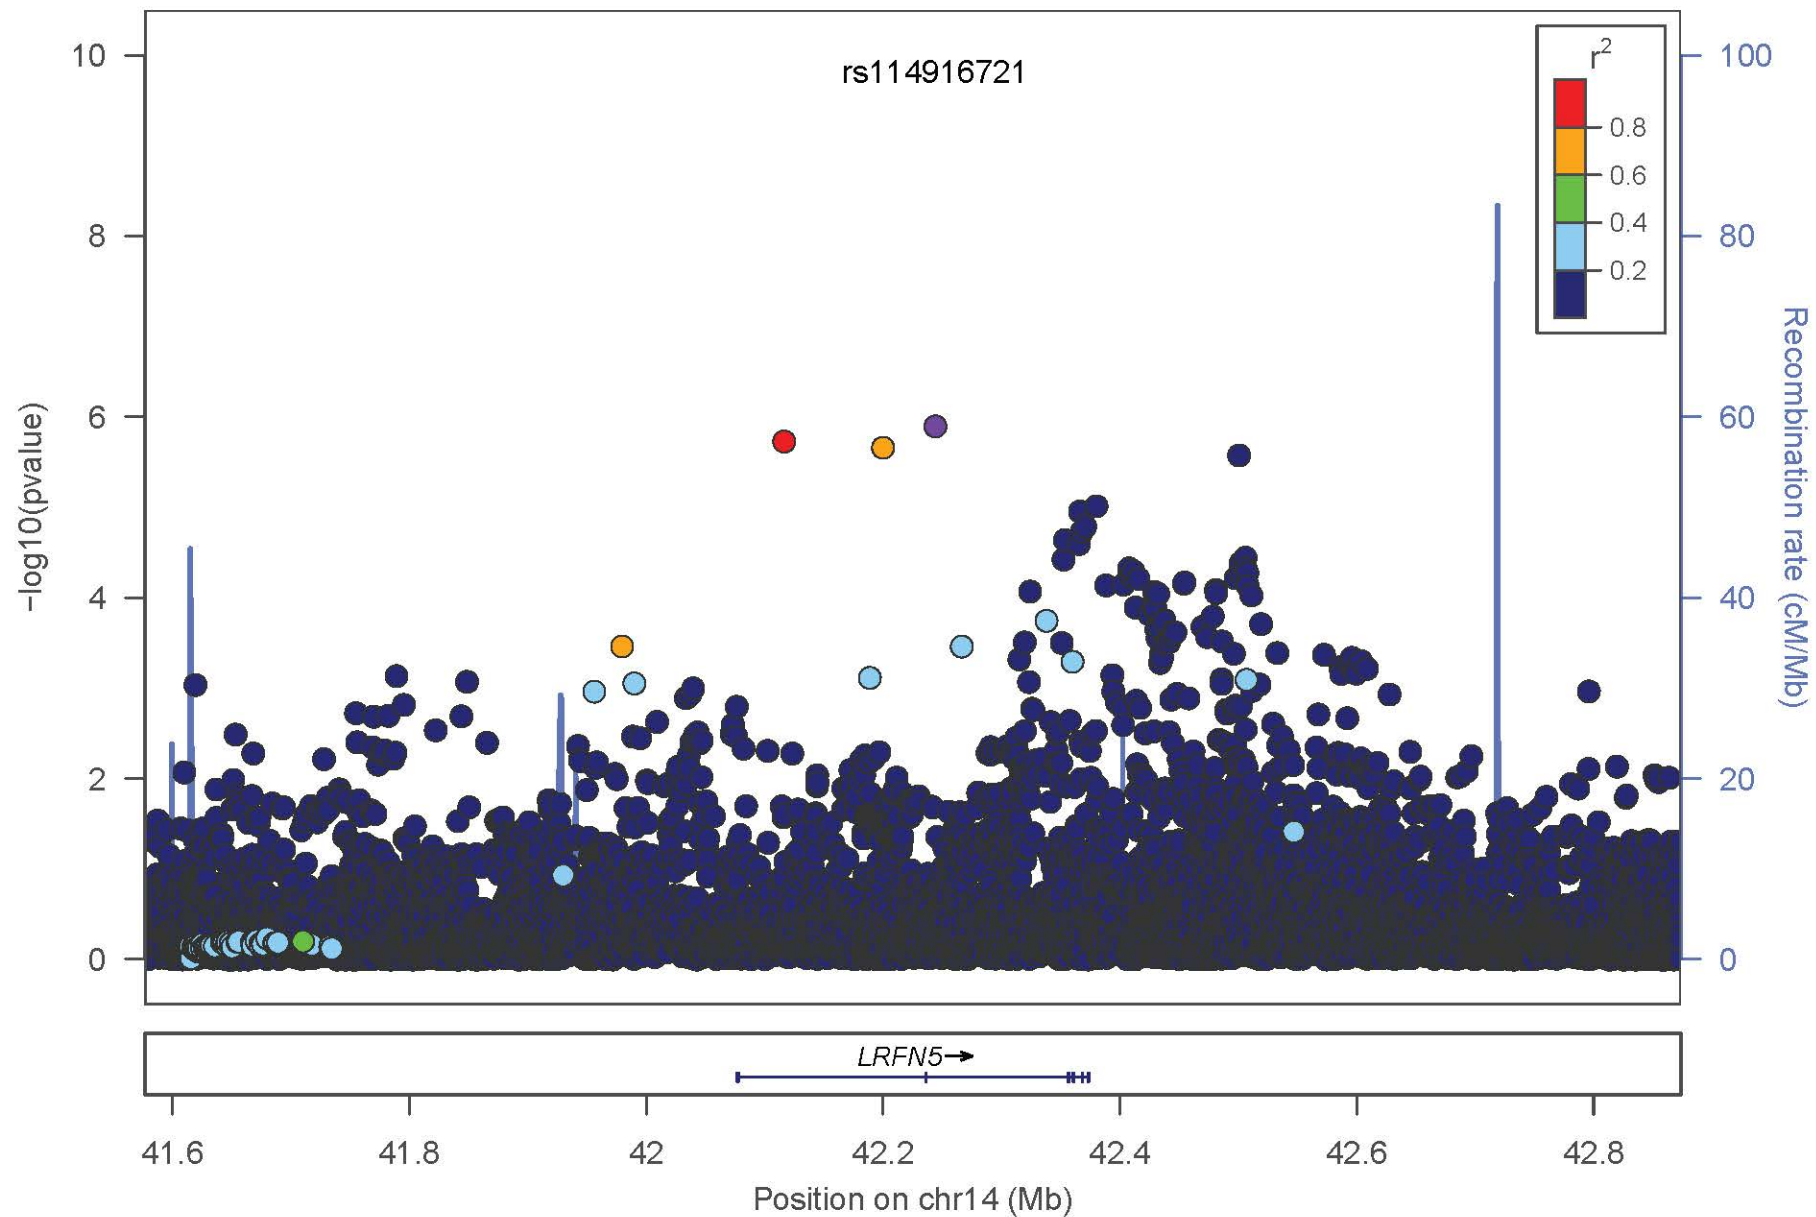

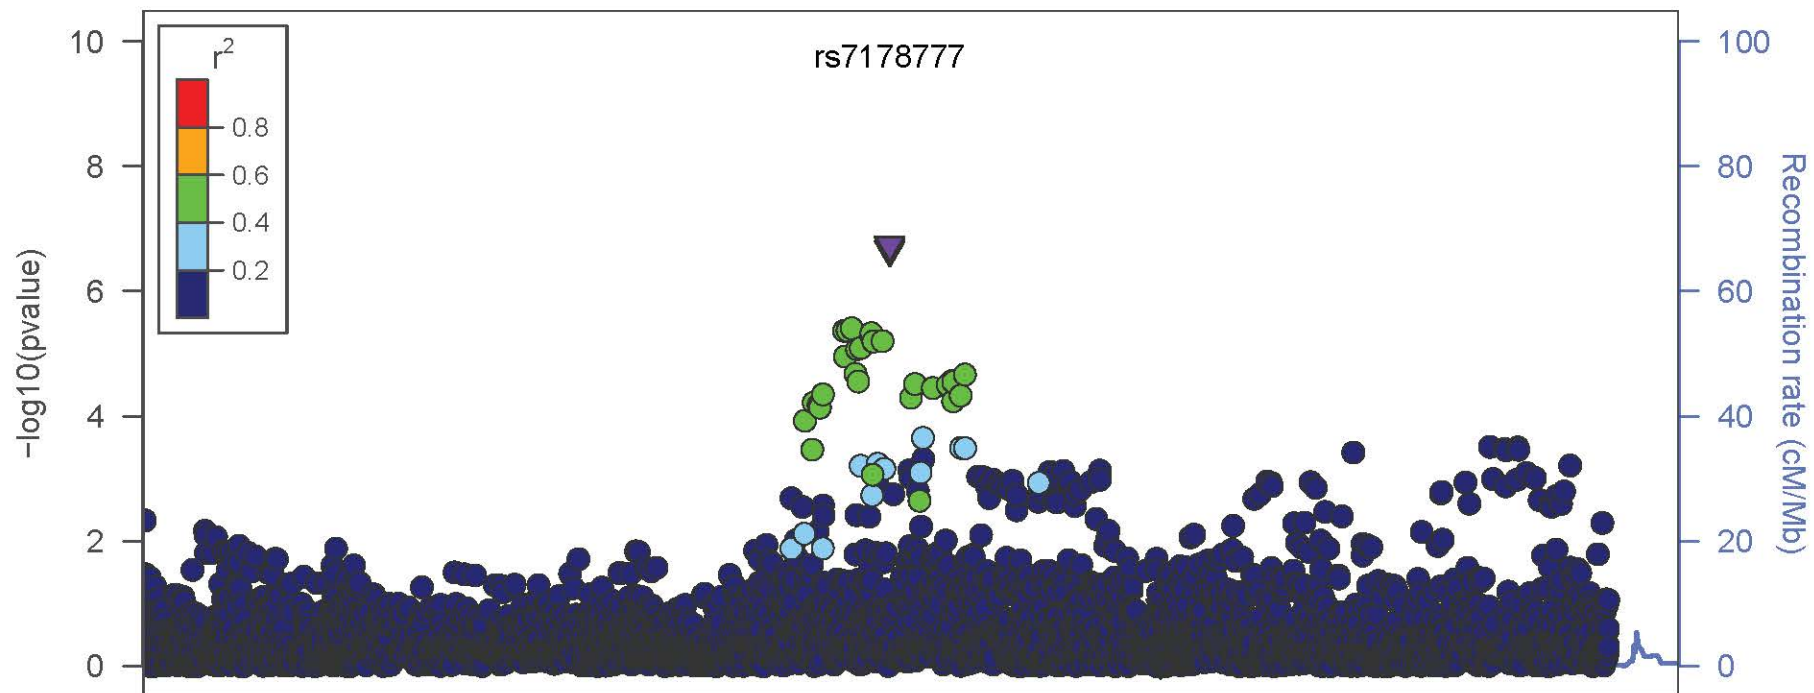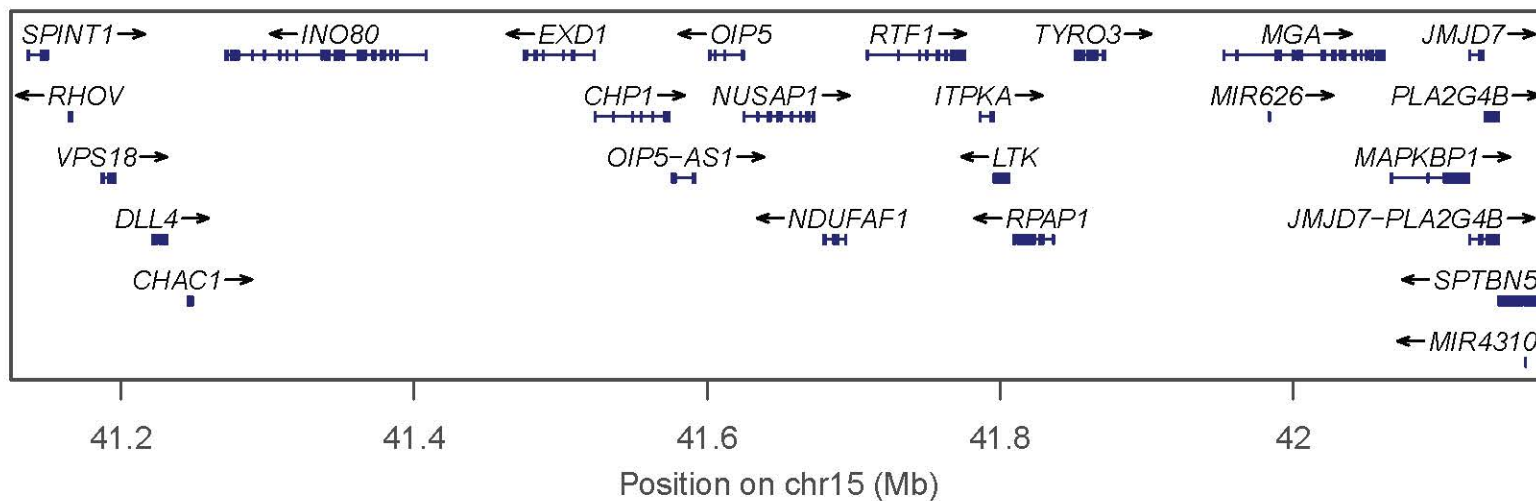

## Legends:

**Figure S1:** Quantile-quantile of  $p$ -values for BMI genome-wide association results. The x-axis represents expected  $p$ -values and the y-axis represents observed  $p$ -values,  $\lambda = 1.01$ .

**Figure S2:** *NOSTRIN* regional plot. The x-axis represents positions (Mb) and the y-axis represents  $-\log_{10}(p\text{-values})$ . The recombination rates and  $r^2$  scores were calculated from AFR samples in the 1000 Genomes Project (phase1, V3).

**Figure S3:** *PPP2R2B* regional plot. The x-axis represents positions (Mb) and the y-axis represents  $-\log_{10}(p\text{-values})$ . The recombination rates and  $r^2$  scores were calculated from AFR samples in the 1000 Genomes Project (phase1, V3).

**Figure S4:** *SLC1A2* regional plot. The x-axis represents positions (Mb) and the y-axis represents  $-\log_{10}(p\text{-values})$ . The recombination rates and  $r^2$  scores were calculated from AFR samples in the 1000 Genomes Project (phase1, V3).

**Figure S5:** *LRFN5* regional plot. The x-axis represents positions (Mb) and the y-axis represents  $-\log_{10}(p\text{-values})$ . The recombination rates and  $r^2$  scores were calculated from AFR samples in the 1000 Genomes Project (phase1, V3).

**Figure S6:** *NUSAP1* regional plot. The x-axis represents positions (Mb) and the y-axis represents  $-\log_{10}(p\text{-values})$ . The recombination rates and  $r^2$  scores were calculated from AFR samples in the 1000 Genomes Project (phase1, V3).
